# Supplementary material for: Reporting on and Reviewing for Race/Racialization, Ethnicity, and Culture
Source: Atypon-hosted journal article supplement (doi:10.1176/appi.ps.20220099), 2022-04-08
Supplement: appi.ps.20220099.ds001.pdf [file appi.ps.20220099.ds001.pdf]

 


Psychiatry Online
